# Supplementary material
Source: publisher figshare collection journal article supplement (https://acs.figshare.com/ndownloader/files/5733738)
Supplement: Supplementary file 1 [file 5733738]

**Table S2.** Kinetic parameters for the reductive half-reaction of xanthine oxidase with purine substrates. For faster substrates, the anaerobic reaction of enzyme with substrate in pseudo-first order excess was followed at 450 nm (following the bleaching of enzyme upon reduction) by stopped-flow spectrophotometry, with the data were fit to single exponentials to obtain  $k_{obs}$ . For slower substrates, the reaction was followed in a diode array spectrophotometer, with rate constants obtained from linear fits to a semilogarithmic plot of  $\ln(\Delta A/\Delta A_0)$  versus time. The reaction conditions were 0.1 M MES buffer, 0.1 N KCl pH 7.0, 25 °C. Plots of  $k_{obs}$  versus [substrate] were fitted using the hyperbolic relationship  $k_{obs} = k_{red}[S]/(K_d + [S])$  to obtain the limiting rate of reduction,  $k_{red}$ , and substrate dissociation constant,  $K_d$  [4c]. (b) In the case of 2-hydroxy-6-methylurine, 2-thioxanthine and 6-thioxanthine there was no substrate concentration dependence observed in the reductive half-reaction. For these three substrate the relevant kinetic parameters given in Table 2 were followed under conditions of a pseudo first-order excess of enzyme rather than substrate under aerobic conditions, following the reaction by the small spectral changes arising from the molybdenum center itself.

|                                                                                     |                                        | $k_{red} (s^{-1})$ | $K_d (\mu M)$        | $k_{red}/K_d (M^{-1}s^{-1})$ |
|-------------------------------------------------------------------------------------|----------------------------------------|--------------------|----------------------|------------------------------|
|    | xanthine                               | 7.0                | 0.54                 | $1.3 \times 10^7$            |
|    | 1-methylxanthine                       | 13.9               | 4.5                  | $3.1 \times 10^6$            |
|    | 3-methylxanthine                       | (0.0005)           | no reaction detected |                              |
|    | 7-methylxanthine                       | —                  | —                    | $2.0 \times 10^3$            |
|   | 1,3-dimethylxanthine<br>(theophylline) | (0.00005)          | no reaction detected |                              |
|  | 1,7-dimethylxanthine                   | 0.070              | 1200                 | 56                           |
|  | guanine                                | 0.0001             | 59                   | 1.7                          |
|  | 2,6-diaminopurine                      | 0.001              | 52                   | 17                           |
|  | 2-amino-6-chloropurine                 | 0.013              | 133                  | 100                          |
|  | 2-hydroxy-6-methylxanthine             | 0.133              | 1.15                 | $1.2 \times 10^5$            |
|  | 2-thioxanthine                         | 3.0                | —                    | —                            |
|  | 6-thioxanthine                         | 1.4                | 0.95                 | $1.5 \times 10^6$            |
